# Supplementary material for: A shift to something better? A longitudinal study of work schedule and prescribed sleep medication use in nurses
Source: HighWire-hosted journal article supplement (doi:10.1136/oemed-2022-108251), 2022-06-20
Supplement: oemed-2022-108251supp002_data_supplement.pdf [file oemed-2022-108251supp002_data_supplement.pdf]

## Supplemental tables

Supplemental table 1: Odds ratio (OR)\* with 95% confidence interval (CI) of work schedule with nights (in current wave) by prescribed sleep medication use (in current wave) over a 12-years follow-up period among Norwegian nurses (n=2028)

|                      | Random effects model | Fixed effects model |
|----------------------|----------------------|---------------------|
|                      | OR (95% CI)          | OR (95% CI)         |
| Sleep medication use |                      |                     |
| Yes                  | 0.99 (0.74-1.34)     | 1.13 (0.69-1.86)    |
| No                   | 1.00 (ref.)          | 1.00 (ref.)         |

Models based on longitudinal data. The random effects model links changes in work schedule to changes in sleep medication use both within and between individuals, whereas the fixed effect model only assesses within-individual differences. Total study sample n=1881 (8434 observation) in the random effects model, n=526 (2838 observations) in the fixed effects model.

\*Adjusted for wave and work schedule in the preceding wave.
